# Supplementary material for: Identification of Virulence Factors in Isolates of Candida haemulonii, Candida albicans and Clavispora lusitaniae with Low Susceptibility and Resistance to Fluconazole and Amphotericin B
Source: MDPI journal article supplement (doi:10.3390/microorganisms12010212), 2024-01-20
Supplement: s1 [file s1]

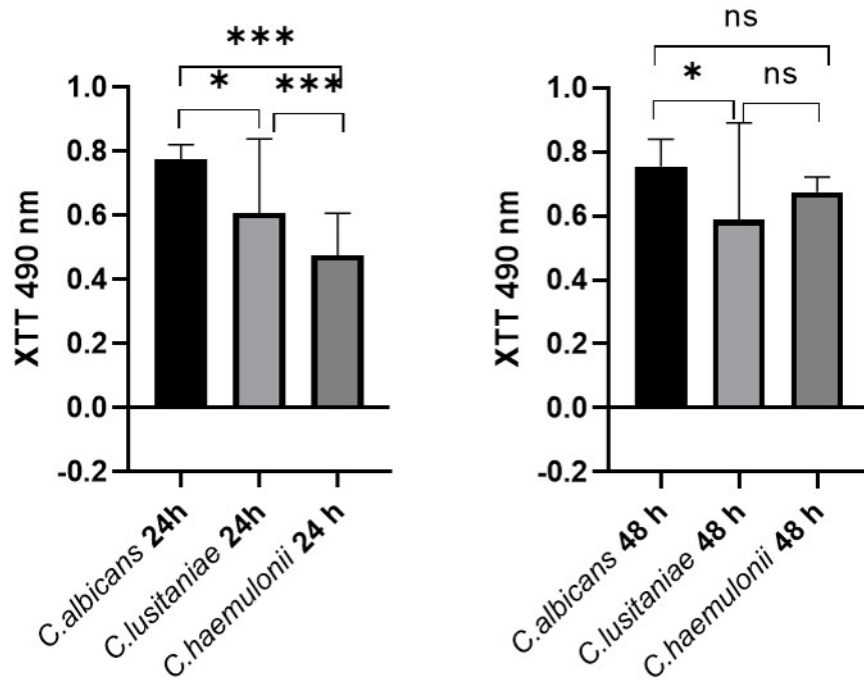

Figure S1. Hydrophobicity and adherence on plastic surface of *C. albicans*, *C. lusitanae* and *C. haemulonii* isolates. Median values obtained for species are presented. (\*  $p < 0.05$ ; \*\*\*\*  $p < 0.0001$ )

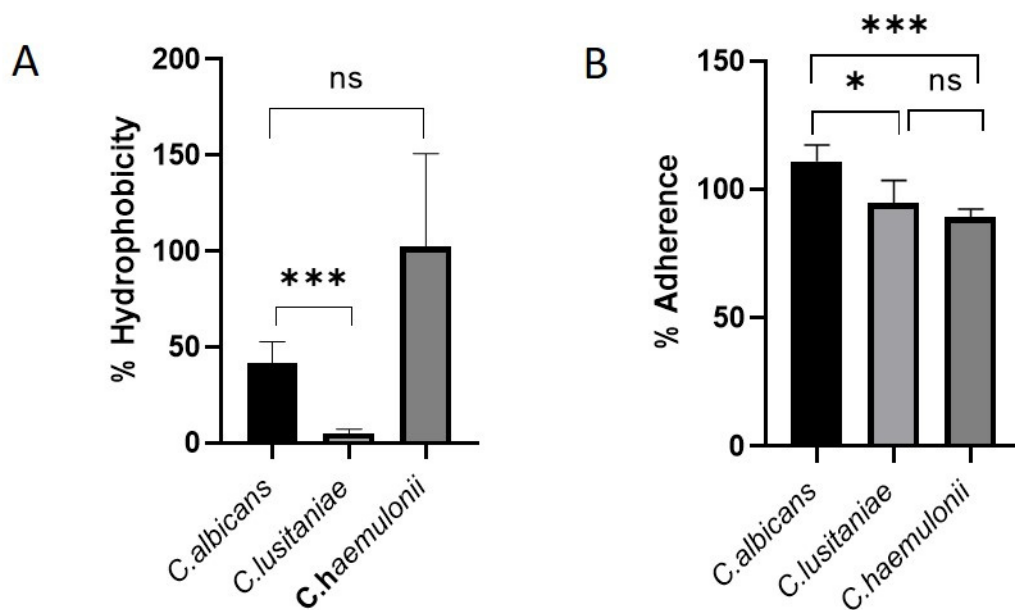

Figure S2. Biofilm formation after 24 and 48 h of *C. albicans*, *C. lusitanae* and *C. haemulonii* isolates. Median values obtained for species are presented. (\*  $p < 0.05$ ; \*\*\*\*  $p < 0.0001$ )
